# Supplementary material for: Addressing the Silent Epidemic of Hepatitis B Virus: Awareness, Screening and Vaccination Efforts in Abuja, Nigeria
Source: Research Square preprint supplement (doi:10.21203/rs.3.rs-5079063/v1), 2024-10-17
Supplement: Supplementary file 1 [file 04279acae00320b6d0cc8969.xlsx]

## Sheet: Positive cases
COMPREHENSIVE LIST OF POSITIVE CASES FOR HEPATITIS B VIRUS (MAY - AUGUST)
S/N	CODE	LOCATION	AGE	T/D	GENDER	REPORT
1	100 - KA22 - DL44	KABUSA	22		F	NEW
2	101 - KA28 - JB23	KABUSA	28		F	KNOWN (ON HERBAL MEDICATION)
3	102 - KA25 - NS57	KABUSA	25		F	KNOWN
4	103 - KA34 - FH05	KABUSA	34		F
5	104 - KA28 - JC40	KABUSA	28		F
6	105 - KA39 - OO29	KABUSA	39		F	KNOWN (LOW VIRAL LOAD)
7	106 - KA48 - MC93	KABUSA	48		F	NEW
8	107 - KA50 - JM77	KABUSA	50		F	KNOWN (HERB)
9	108 - KA25 - KE29	KABUSA	25		F	LAMIVUDINE
10	109 - KA22 - YP55	KABUSA	22		F	NEW
11	110 - KA40 - AJ78	KABUSA	40		F	NEW (ENLARGEMENT HEPATITIS) SUSPECTED SLIGHT HEPTOMEGALY FROM PREVIOUS SCAN
12	111 - KA22 - SJ78	KABUSA	22		F	KNOWN (DIAGNOSED AT 9/10 YEARS OF AGE)
13	112 - MA31 - AB35	MABUCHI	31		M	NEW
14	113 - TL55 - DC44	TAKALAFIA	55		F	NEW (CONTACT PERSON: SALAMA YAIRUS, TAKALAFIA)
15	114 - KA41 - AA54	KABUSA	41		M	KNOWN FOR 7 YEARS (NO DRUGS)
16	115 - KA28 - OC24	KABUSA	28		M	KNOWN (JAUNDICE)
17	116 - KA25 - OC07	KABUSA	25		M	KNOWN (JAUNDICE)
18	117 - KA30 - US91	KABUSA	30		F	NEW
19	118 - KA30 - OE98	KABUSA	30		F	KNOWN
20	119 - AG40 - JM79	ANAWIM GWAGWALADA	40		F
21	120 - AD27 - BA70	ANGANDODO	27		F	KNOWN
22	121 - HC31 - DP65	HAJJ CAMP	31		M	KNOWN
23	122 - DA50 - UC63	DAGIRI	50		M
24	123 - DA32 - NN68	DAGIRI	32		M	KNOWN
25	124 - BA37 - OC94	BASAGWA(AIRPORT ROAD)	37		F	KNOWN
26	125 - AD38 - OK37	ANGANDODO	38		F	KNOWN
27	126 - OK30 - DE47	OLD KUTUNKU	30		F	KNOWN
28	127 - BW29 - JB45	BWARI	29		M
29	128 - KU28 - DE22	KUTUNKU	28		M	KNOWN
30	129 - HC29 - DJP69	HAJJ CAMP	29		M
31	130 - KU35 - LN55	KUJE	35		F	NON-REACTIVE
32	131 - DK19 - BA10	DAKWO	19		F	NEW CASE
33	132 - DK20 - JH34	DAKWO	20		F	KNOWN IN FEBUARY AND IS TAKING HERBS
34	133 - DK30 - ZB61	DAKWO	30		F
35	134 - DK38 - MK82	DAKWO	38		F
36	135 - DK26 - RE14	DAKWO	26		M	INACTIVE
37	136 - DK30 - DM77	DAKWO	30		F
38	137 - DK35 - AV30	DAKWO	35		M	TAKING HERBAL MEDICINE
39	138 - DK23 - JG19	DAKWO	23		F
40	139 -DK23 - AD--	DAKWO	23		F
41	140 - DK24 - IN99	DAKWO	24		M	NEVER TAKEN MEDICINE
42	141 - DK50 - EG88	DAKWO	50		F
43	142 - GU34 - ME04	GUDUWI	34		F
44	143 - KG33 - OG32	KABUSA GARDENS	33		M	NEW CASES
45	144 - KA28 - TK95	KABUSA	28		M	KNOWN IN 2007 AND IS TAKING HERBS
46	145 - KA49 - YO84	KABUSA	49		M	KNOWN FOR 7 YEARS : METHAONINE
47	146 - GU20 - JR16	GUDUWI	20		F	NEW CASE (NEEDS ASSISTANCE)
48	147 - DK38 - ND81	DAKWO	38		F	NEW CASE
49	148 - DK22 - BS69	DAKWO	22		M	NEW CASE
50	149 - GU35 - DB70	GUDUWI	35		F	NEW CASE
51	150 - DK35 - CJ32	DAKWO	35		F	KNOWN FOR 2 YEARS
52	151 - AW28 - NP22	APO WARU	28		M	NEW
53	152 - AW26 - PI54	APO WARU	26		M	NEW
54	153 - AW50 - UR77	APO WARU	50		M	KNOWN
55	154 - AW33 - AC07	APO WARU	33		M	NEW
56	155 -AW39 - CM46	APO WARU	39		F
57	156 - AW20 - KA19	APO WARU	20		F	NEW
58	157 - AW23 - NR81	APO WARU	23		F
59	158 - AW27 - AA97	APO WARU	27		M
60	159 - AW22 - YD13	APO WARU	22		F
61	160 - AW44 - PI54	APO WARU	44		F
62	161 - AW22 - DN66	APO WARU	22		M	KNOWN
63	162 - AW36 - EA20	APO WARU	36		F	NEW
64	163 - YE44 - KI89	YEMITU	44		M	KNOWN
65	164 - AW28 - IH84	APO WARU	28		F	NEW
66	165 - AW30 - IZ84	APO WARU	30		F	NEW
67	166 - AW20 - PI36	APO WARU	20		M	KNOWN
68	167 - AW25 - BR88	APO WARU	25		F	KNOWN
69	168 - AW30 - LN56	APO WARU	30		F	KNOWN
70	169 - YE35 - IB00	YEMITU	35		M	NEW
71	170 - AW40 - AJ05	APO WARU	40		F	KNOWN
72	171 - AW26 - ME25	APO WARU	26		F	NEW
73	172 - AW27 - JA15	APO WARU	27		F	KNOWN
74	173 - AW25 - JR94	APO WARU	25		F	KNOWN
75	174 - AW32 - AS32	APO WARU	32		M	KNOWN
76	175 - AW34 - KP96	APO WARU	34		M	NEW
77	176 - AW18 - LH58	APO WARU	18		F	KNOWN
78	177 - WA32 - KK98	WARU	32		M	NEW
79	178 - DG22 - YG78	DOGONGADA	22		F
80	179 - DG45 - SL81	DOGONGADA	45		F
81	180 - DG23 - MM53	DOGONGADA	23		F
82	181 - DG25 - DJ94	DOGONGADA	25		F
83	182 - DG31 - OS93	DOGONGADA	31		M
84	183 - DG30 - MA26	DOGONGADA	30		F
85	184 - SH21 - TJ69	SHERITY	21		F
86	185 - SH22 - YZ67	SHERITY	22		F
87	186 - SH19 - UA97	SHERITY	19		M
88	187 - SH26 - SS--	SHERITY	26		F
89	188 - SH25 - YM09	SHERITY	25		M
90	189 - SH25 - MA43	SHERITY	25		M
91	190 - SH25 - AR79	SHERITY	25		F
92	191 - SH18 - OM51	SHERITY	18		M
93	192 - SH35 - AA43	SHERITY	35		M
94	193 - SH35 - TU85	SHERITY	35		M
95	194 - SHAD - YS94	SHERITY			M
96	195 - SH20 - AA67	SHERITY	20		M
97	196 - SH22 - AM93	SHERITY	22		F
98	197 - SH36 - SM80	SHERITY	36		F
99	198 - UT27 - PC65	UTAKO	27		F	KNOWN
100	199 - JH231 - AD64	JAHI 2	31		M	NEW
101	200 - ZU35 - IL11	ZUBA	35		M	KNOWN BUT NOT ON TREATMENT
102	201 - JB26 - EB86	JABI	26		F	KNOWN AND TAKING HERBS
103	202 - UT21 - NM03	UTAKO	21		M	KNOWN AND TAKING HERBS
104	203 - UT22 - DW47	UTAKO	22		M	KNOWN
105	204 - MK18 - MS10	MASAKA	18		M
106	205 - UT27 - TJ05	UTAKO	27		M
107	206 - KD48 - AN68	KADO	48		M
108	207 - KD27 - DA47	KADO	27		M
109	208 - LU30 - CB67	LUGBE	30		M
110	209 - GW32 - LJ93	GWARINPA	32		M
111	210 - GW27 - PR9	GWARINPA	27		F
112	211 - GW39 - NO37	GWARINPA	39		F
113	212 - GW37 - AA90	GWARINPA	37		F
114	213 - GW31 - UB21	GWARINPA	31		F
115	214 - JB25 - SM51	JABI	25		M
116	215 - GW26 - NM22	GWARINPA	26		M
117	216 - GW19 - OC55	GWARINPA	19		F
118	217 - LC47 - WP81	LIFE CAMP	47		M
119	218 - GW22 - RR21	GWARINPA	22		F
120	219 - GW34 - IP77	GWARINPA	34		M
121	220 - GW24 - DP08	GWARINPA	24		M
122	221 - GW30 - SL37	GWARINPA	30		F
123	222 - GW40 - JC05	GWARINPA	40		M
124	223 - GW33 - PR56	GWARINPA	33		F
125	224 - GW30 - KJ86	GWARINPA	30		F
126	225 - GW27 - PB76	GWARINPA	27		M
127	226 - GW22 - NL68	GWARINPA	22		F
128	227 - GW65 - IA61	GWARINPA	65		M
129	228 - GW25 - NJ23	GWARINPA	25		F
130	229 - GW57 - DB32	GWARINPA	57		M
131	230 - GW36 - YH82	GWARINPA	36		M
132	231 - GW26 - EE00	GWARINPA	26		F
133	232 - GW54 - OC94	GWARINPA	54		M
134	233 - MR37 - TD15	MARABA	37	M	NEW
135	234 - AK42 - AR91	ASOKORO	42	F	KNOWN CASE SINCE 2009
136	235 - AK39 - GS28	ASOKORO	39	M	KNOWN CASE SINCE 2012
137	236 - AK58 - AJ58	ASOKORO	58	M	NEW
138	237 - AK39 - OS99	ASOKORO	39	M	NEW
139	238 - AK33 - AC10	ASOKORO	33	M	NEW
140	239 - AK42 - JJ24	ASOKORO	42	F	NEW
141	240 - KW34 - JJ91	Kwali	34	M
142	241 - JB30 - CJ05	JABI	30	F
143	242 - WU24 - OG78	Wuse	24	M
